# Supplementary material for: An analysis of intra array repeats: the good, the bad and the non informative
Source: PubMed Central journal article supplement (PMC1501018; doi:10.1186/1471-2164-7-136), 2006-06-05

GSE995  $R^2=0.9078$

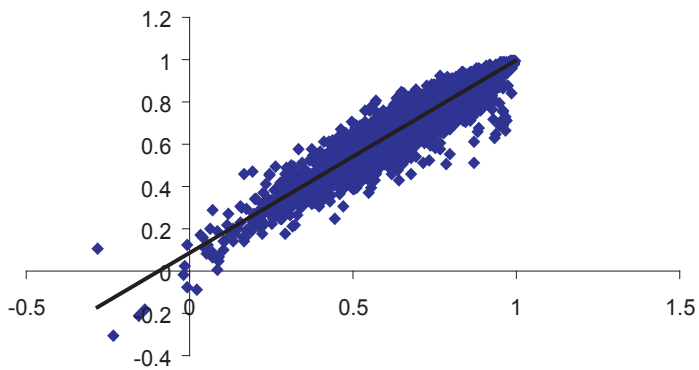

GSE473  $R^2=0.929$

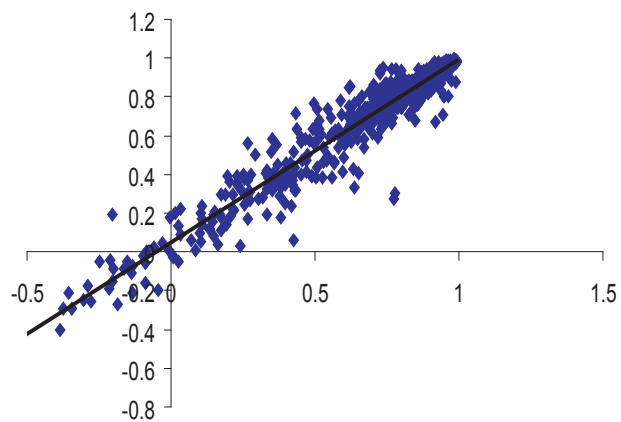

GSE974  $R^2=0.9075$

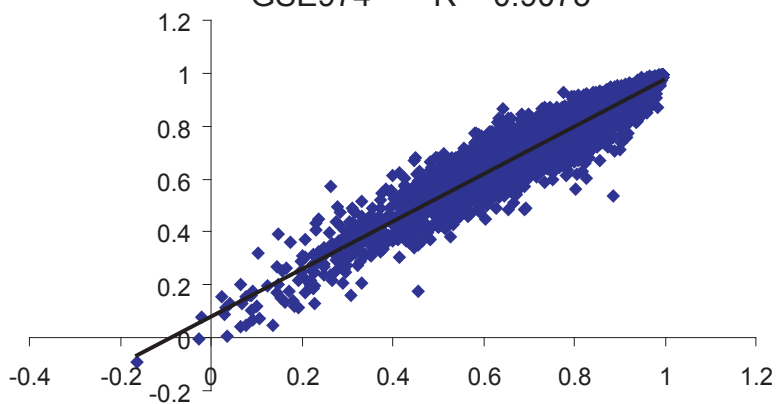

GSE1133  $R^2=0.7142$

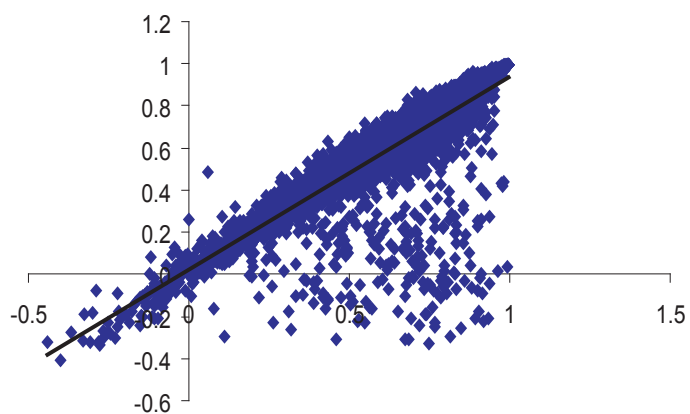

Supplement: 1471-2164-7-136-S5.pdf [file 1471-2164-7-136-S5.pdf]
